# Supplementary material for: Statistically derived asymmetric membrane potentials from α-helical and β-barrel membrane proteins
Source: PubMed Central journal article supplement (PMC5849751; doi:10.1038/s41598-018-22476-6), 2018-03-13
Supplement: 41598_2018_22476_MOESM1_ESM.pdf [file 41598_2018_22476_MOESM1_ESM.pdf]

Supplementary Material for:

**Statistically derived asymmetric membrane potentials from  
 $\alpha$ -helical and  $\beta$ -barrel membrane proteins**

Julia Koehler Leman<sup>1,2</sup>, Richard Bonneau<sup>1,2,3</sup>, Martin Ulmschneider<sup>4</sup>

<sup>1</sup> Center for Computational Biology, Flatiron Institute, Simons Foundation, New York, 10010 NY

<sup>2</sup> Department of Biology, Center for Genomics and Systems Biology, New York University, New York, 10003 NY

<sup>3</sup> Department of Computer Science, New York University, New York, 10012 NY

<sup>4</sup> Medical School, University of Exeter, Exeter EX1 2LU, UK

**Supplementary Methods:**

***PDB codes of the 239  $\alpha$ -helical membrane proteins in our database:***

1AFO, 1C17, 1FDM, 1H2S, 1JB0, 1KF6, 1KQF, 1M0K, 1M56, 1NKZ, 1OKC, 1ORS, 1P49, 1PPJ, 1RZH, 1U19, 1U7G, 1XIO, 1XRD, 1ZZA, 2A65, 2BHW, 2BL2, 2BS2, 2CFQ, 2FYU, 2H88, 2IH3, 2J58, 2J7A, 2JLN, 2K73, 2K9J, 2K9P, 2K9Y, 2KLU, 2KNC, 2KOG, 2KS9, 2KSD, 2KSE, 2KSF, 2LOJ, 2L2T, 2L35, 2L9U, 2LCK, 2LOM, 2LOR, 2LOS, 2LOT, 2LP1, 2LZL, 2M67, 2M7G, 2MFR, 2MIC, 2MKV, 2MMU, 2MN6, 2MOF, 2MPN, 2MXB, 2N2A, 2N4X, 2NA8, 2NDJ, 2NQ2, 2NRG, 2QTS, 2R9R, 2VPZ, 2WDQ, 2WSW, 2XFN, 2XOV, 2YEV, 2Z73, 2ZXE, 3AR4, 3AYF, 3B9W, 3C02, 3CX5, 3D31, 3DDL, 3DH4, 3EGW, 3G6B, 3GIA, 3H90, 3K06, 3K3F, 3KLY, 3LDC, 3M73, 3MP7, 3NE2, 3NE5, 3NYM, 3PCV, 3QAP, 3QE7, 3RKO, 3RLF, 3RQW, 3S8G, 3TDS, 3TUI, 3TX3, 3UG9, 3VMA, 3VW7, 3W4T, 3WAJ, 3WFD, 3WVG, 3WO6, 3WU2, 3WXW, 3ZE3, 3ZOJ, 4A01, 4AL0, 4BEM, 4BVN, 4C7R, 4COF, 4DVE, 4DX5, 4ENE, 4EZC, 4G7V, 4GC0, 4GX0, 4HFI, 4HUQ, 4HYJ, 4I0U, 4IFF, 4IKV, 4J05, 4K1C, 4KPP, 4KYT, 4LP8, 4LXJ, 4M5B, 4MBS, 4MES, 4MND, 4MRS, 4N6H, 4N7W, 4NV5, 4O6M, 4O6Y, 4O93, 4OGQ, 4P02, 4P79, 4PD6, 4PGR, 4PHZ, 4PL0, 4Q4H, 4QND, 4QTN, 4QUV, 4R0C, 4RDQ, 4RI2, 4RNG, 4RP9, 4RYO, 4TQ3, 4U4T, 4U9N, 4UC1, 4UMW, 4UVM, 4V1G, 4WD8, 4WFE, 4X5M, 4X89, 4XES, 4XK8, 4XNV, 4XP9, 4XTL, 4XU4, 4YMK, 4YMU, 4YSX, 4Z3N, 4ZP0, 4ZR1, 4ZW9, 5A1S, 5AJI, 5AWW, 5AX0, 5AYN, 5AZB, 5B0W, 5B1A, 5BW8, 5BZ3, 5C6O, 5C6P, 5C78, 5CKR, 5DQQ, 5DWY, 5EDL, 5EIK, 5EKE, 5EZM, 5FXB, 5G28, 5G2C, 5G2D, 5HK1, 5HYA, 5I20, 5I32, 5ID3, 5IU4, 5IWS, 5J4I, 5KBW, 5KUK, 5SVK, 5SYT, 5T1A, 5TCX, 5TIS, 5U09

***PDB codes of the 96  $\beta$ -barrel membrane proteins in our database:***

1A0T, 1EK9, 1FEP, 1KMO, 1P4T, 1QD6, 1QJ8, 1QJP, 1UUN, 1UYN, 1WP1, 1XKW, 1YC9, 2ERV, 2F1V, 2FGQ, 2GR8, 2GUF, 2HDI, 2LHF, 2LME, 2MAF, 2MPR, 2POR, 2VDF, 2W16, 2WJR, 2X27, 2X55, 2X9K, 2Y2X, 2YNK, 3AEH, 3BS0, 3CSL, 3DWO, 3DZM, 3EFM, 3FHH, 3FID, 3GP6, 3KVN, 3O44, 3PGU, 3PRN, 3QQ2, 3QRA, 3RFZ, 3SY7, 3SY9, 3SYB, 3SZV, 3T0S, 3V8X, 3VY8, 3W9T, 3X2R, 4AFK, 4B7O, 4C00, 4C69, 4CU4, 4D5B, 4E1S, 4E1T, 4FQE, 4FRX, 4FSO, 4FSP, 4FUV, 4GEY, 4K3C, 4K7R, 4MEE, 4MT4, 4N75, 4Q35, 4QL0, 4RDR, 4RJW, 4RL8, 4RLC, 4Y25, 5DL5, 5DL6, 5DL7, 5DL8, 5FOK, 5FP1, 5FR8, 5FVN, 5IUU, 5IVA, 5IXM, 5LDV, 7AHL

### Supplementary Table 1:

Number of redundant membrane protein structures for different types of membrane bilayers. Counts were taken from the OPM website (<http://opm.phar.umich.edu/localization.php>).

| <i>membrane type</i> <sup>a</sup>         | <i>pro/eu</i> <sup>b</sup> | <i>#prot</i> <sup>c</sup> | <i>#sol P</i> <sup>d</sup> | <i>#MPs</i> <sup>e</sup> | <i>α</i> <sup>f</sup> | <i>β</i> <sup>g</sup> |
|-------------------------------------------|----------------------------|---------------------------|----------------------------|--------------------------|-----------------------|-----------------------|
| <i>archaeobacterial membrane</i>          | pro                        | 94                        | 7                          | 87                       | 87                    | -                     |
| <i>bacterial gram-neg IM</i>              | pro                        | 494                       | 94                         | 400                      | 400                   | -                     |
| <i>bacterial gram-neg OM</i>              | pro                        | 227                       | 31                         | 196                      | 7                     | <b>189</b>            |
| <i>bacterial gram-pos OM</i>              | pro                        | 10                        | 9                          | 1                        | -                     | <b>1</b>              |
| <i>bacterial gram-pos plasma membrane</i> | pro                        | 144                       | 47                         | 97                       | 97                    | -                     |
| <i>sum</i> <sup>h</sup>                   |                            |                           |                            |                          | <b>591</b>            | <b>190</b>            |
| <i>cytoplasmic granule membrane</i>       | -                          | 1                         | 1                          | -                        | -                     | -                     |
| <i>secreted</i>                           | -                          | 981                       | 938                        | 43                       | 35                    | 8 <sup>i</sup>        |
| <i>thylakoid membrane</i>                 | -                          | 42                        | 14                         | 28                       | 28                    | -                     |
| <i>undefined</i>                          | -                          | 118                       | 113                        | 5                        | 3                     | 2                     |
| <i>viral membrane</i>                     | -                          | 91                        | 64                         | 27                       | 27                    | -                     |
| <i>sum</i>                                |                            |                           |                            |                          | <b>93</b>             | <b>10</b>             |
| <i>chloroplast IM</i>                     | eu                         | 2                         | 2                          | -                        | -                     | -                     |
| <i>chloroplast OM</i>                     | eu                         | 2                         | 2                          | -                        | -                     | -                     |
| <i>ER membrane</i>                        | eu                         | 209                       | 118                        | 91                       | 91                    | -                     |
| <i>endosome membrane</i>                  | eu                         | 56                        | 47                         | 9                        | 9                     | -                     |
| <i>eukaryotic plasma membrane</i>         | eu                         | 845                       | 427                        | 418                      | 418                   | -                     |
| <i>golgi membrane</i>                     | eu                         | 35                        | 35                         | -                        | -                     | -                     |
| <i>lysosome membrane</i>                  | eu                         | 23                        | 20                         | 3                        | 3                     | -                     |
| <i>mitochondrial IM</i>                   | eu                         | 80                        | 38                         | 42                       | 42                    | -                     |
| <i>mitochondrial OM</i>                   | eu                         | 33                        | 15                         | 18                       | 10                    | 8                     |
| <i>nuclear IM</i>                         | eu                         | 5                         | 5                          | -                        | -                     | -                     |
| <i>nuclear OM</i>                         | eu                         | 6                         | 6                          | -                        | -                     | -                     |
| <i>peroxisome membrane</i>                | eu                         | 11                        | 11                         | -                        | -                     | -                     |
| <i>vacuole membrane</i>                   | eu                         | 28                        | 18                         | 10                       | 10                    | -                     |
| <i>vesicle membrane</i>                   | eu                         | 22                        | 21                         | 1                        | 1                     | -                     |
| <i>sum</i>                                |                            |                           |                            |                          | <b>584</b>            | <b>8</b>              |

<sup>a</sup> – different membrane types; OM = outer membrane; IM = inner membrane

<sup>b</sup> – eukaryotic or prokaryotic membrane type

<sup>c</sup> – total number of proteins in that type of membrane according to the OPM database

<sup>d</sup> – number of membrane-associated, but not transmembrane, proteins in that membrane type, i.e. these proteins are soluble

<sup>e</sup> – number of membrane proteins in that membrane

<sup>f</sup> – how many of the membrane proteins are α-helical

<sup>g</sup> – how many of the membrane proteins are β-barrels

<sup>h</sup> – sum of α-helical and β-barrels for this class of membranes

<sup>i</sup> – secreted β-barrel MPs are lysins for which the barrel consists of multiple chains

### Supplementary Figure S1:

Amino acid occurrences for  $\alpha$ -helical proteins, considering lipid-accessible and lipid-inaccessible residues separately. Counts were averaged over 3Å bins along the membrane normal.

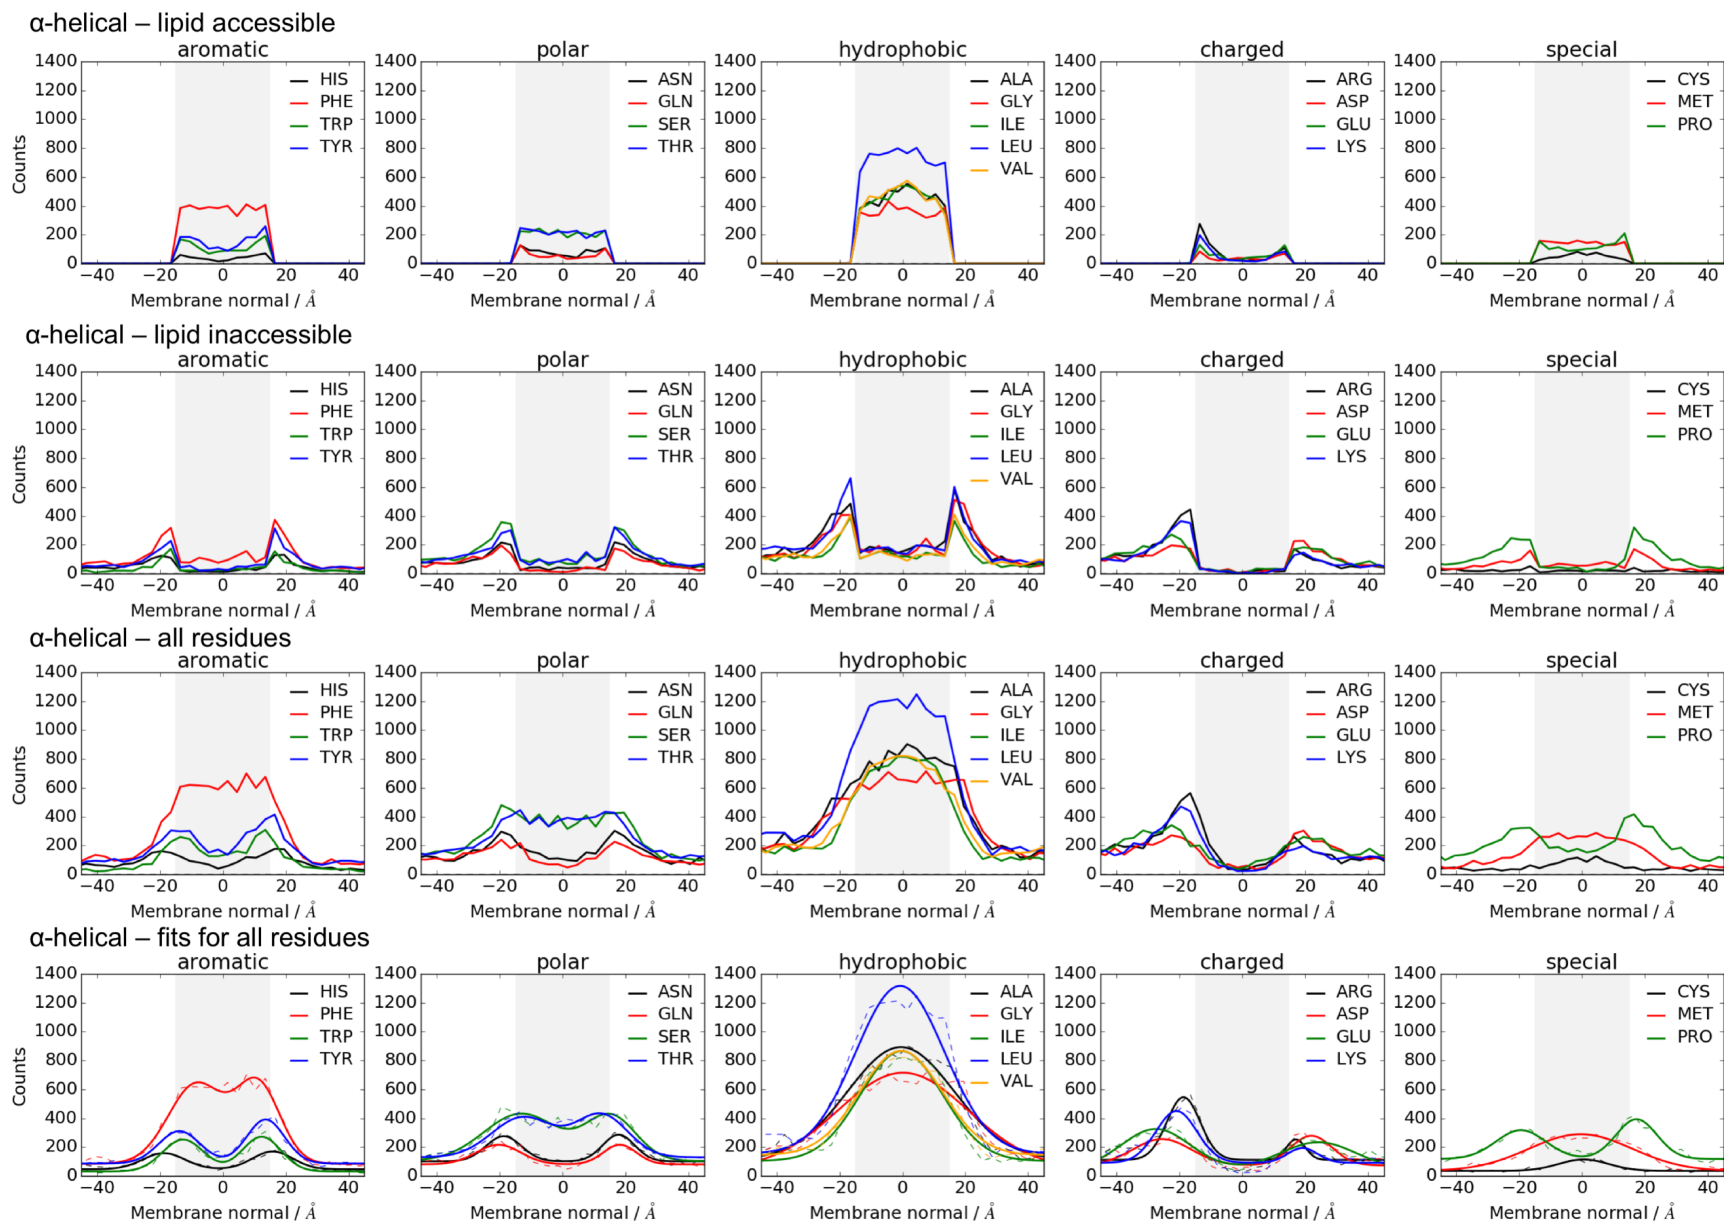

**Supplementary Table 2:**Fitting parameters for total counts for  $\alpha$ -helical proteins (see Supplementary Figure S1).

| amino acid | function  | a        | b         | c        | d       | e        | f       | g       |
|------------|-----------|----------|-----------|----------|---------|----------|---------|---------|
| <b>HIS</b> | dgaussian | 45.9426  | 111.8477  | -18.7311 | 6.6892  | 123.2780 | 15.8104 | 6.4044  |
| <b>PHE</b> | dgaussian | 84.0570  | 553.0258  | -8.4815  | 8.8068  | 544.4241 | 11.1981 | 6.9751  |
| <b>TRP</b> | dgaussian | 30.6708  | 221.0713  | -12.6161 | 6.5237  | 240.7302 | 12.3390 | 6.1409  |
| <b>TYR</b> | dgaussian | 85.9869  | 224.5648  | -13.8022 | 6.5776  | 304.8907 | 13.5983 | 6.0264  |
| <b>ASN</b> | dgaussian | 100.7527 | 174.4990  | -18.7619 | 5.6477  | 184.9904 | 17.7994 | 5.0672  |
| <b>GLN</b> | dgaussian | 80.0819  | 135.5682  | -20.4137 | 7.0684  | 135.7772 | 18.1724 | 5.2534  |
| <b>SER</b> | dgaussian | 103.6965 | 327.8742  | -13.1740 | 11.9214 | 307.0977 | 15.3144 | 7.9998  |
| <b>THR</b> | dgaussian | 128.8560 | 278.1981  | -12.6311 | 9.8470  | 293.4502 | 12.3766 | 8.3310  |
| <b>ALA</b> | gaussian  | 113.2601 | 779.1964  | -0.4875  | 16.9416 |          |         |         |
| <b>GLY</b> | gaussian  | 47.6585  | 667.4080  | 0.1731   | 20.7867 |          |         |         |
| <b>ILE</b> | gaussian  | 103.4647 | 761.5255  | -0.2855  | 13.0411 |          |         |         |
| <b>LEU</b> | gaussian  | 153.2482 | 1163.4179 | -0.7183  | 14.1093 |          |         |         |
| <b>VAL</b> | gaussian  | 143.6374 | 723.0583  | -0.4278  | 13.1572 |          |         |         |
| <b>ARG</b> | dgaussian | 110.7870 | 434.7847  | -18.6558 | 5.3030  | 141.9693 | 17.0798 | 3.0190  |
| <b>ASP</b> | dgaussian | 72.7777  | 182.3676  | -25.4930 | 9.2611  | 205.5760 | 21.9673 | 6.5730  |
| <b>GLU</b> | dgaussian | 46.0040  | 279.2446  | -27.4897 | 10.9056 | 187.4936 | 24.1953 | 11.8811 |
| <b>LYS</b> | dgaussian | 90.6900  | 359.0646  | -20.8885 | 6.5083  | 103.0028 | 19.1817 | 4.7431  |
| <b>CYS</b> | gaussian  | 34.9335  | 78.7127   | 0.4979   | 7.9379  |          |         |         |
| <b>MET</b> | gaussian  | 34.2900  | 254.8837  | -0.4510  | 16.3663 |          |         |         |
| <b>PRO</b> | dgaussian | 117.5398 | 199.7092  | -19.4333 | 7.9062  | 275.4525 | 17.3003 | 6.5076  |

## Supplementary Figure S2:

Amino acid occurrences for  $\beta$ -barrel proteins, considering lipid-accessible and lipid-inaccessible residues separately. Counts were averaged over 3Å bins along the membrane normal.

$\beta$ -barrel – lipid accessible

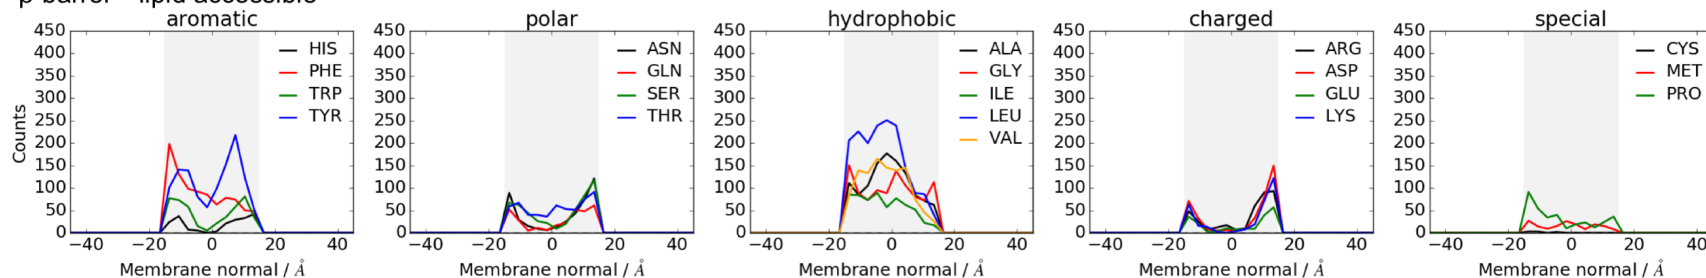

$\beta$ -barrel – lipid inaccessible

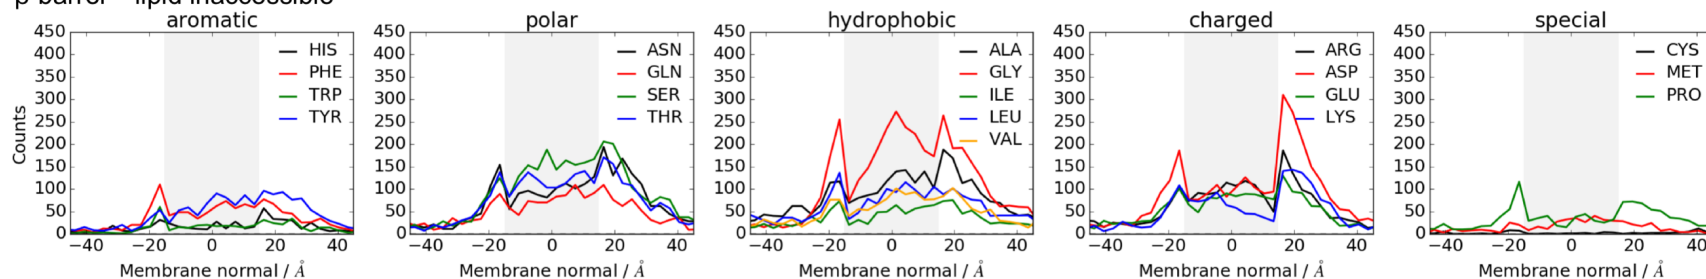

$\beta$ -barrel – all residues

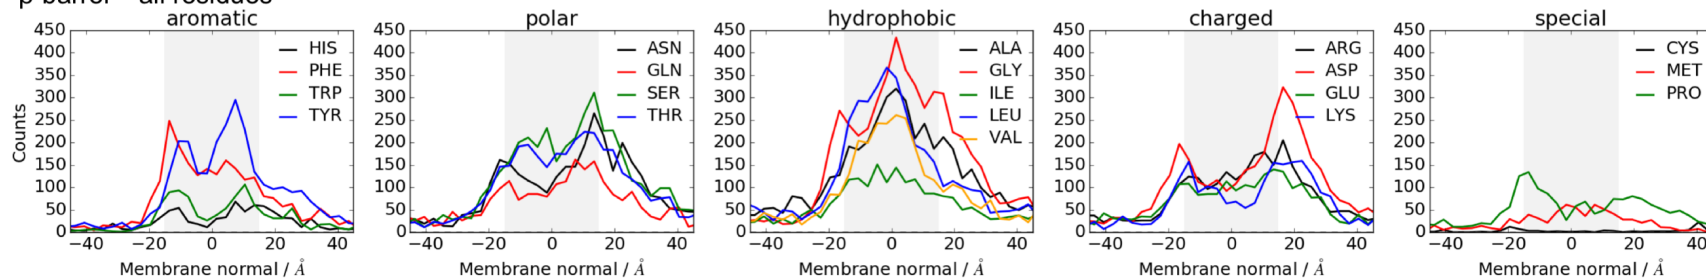

$\beta$ -barrel – fits for all residues

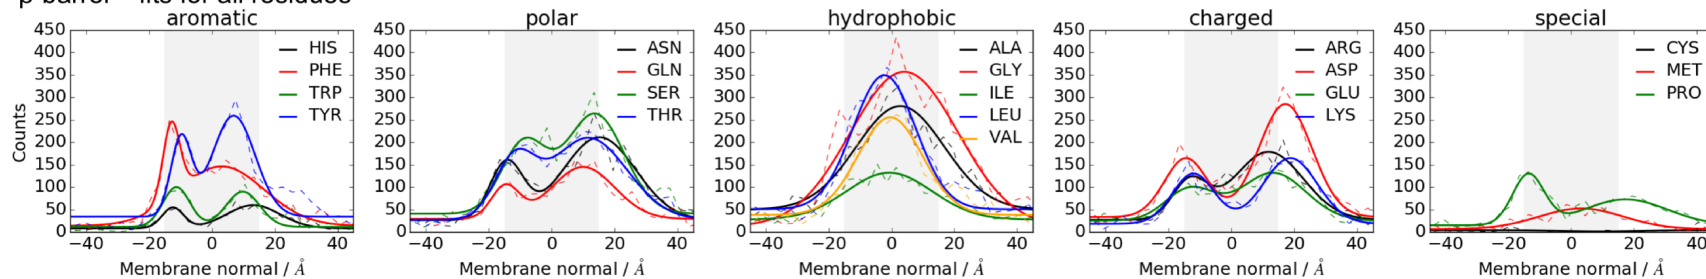

**Supplementary Table 3:**Fitting parameters for total counts for  $\beta$ -barrel proteins (see Supplementary Figure S2).

| amino acid | function  | a       | b        | c        | d       | e        | f       | g       |
|------------|-----------|---------|----------|----------|---------|----------|---------|---------|
| <b>HIS</b> | dgaussian | 8.2031  | 46.0225  | -12.3860 | 3.4095  | 51.5503  | 13.1994 | 8.4881  |
| <b>PHE</b> | dgaussian | 13.5052 | 165.4294 | -12.8650 | 2.6833  | 132.6475 | 3.1051  | 13.6012 |
| <b>TRP</b> | dgaussian | 11.3502 | 88.6820  | -11.2581 | 4.2830  | 78.5192  | 9.8533  | 5.3468  |
| <b>TYR</b> | dgaussian | 34.1224 | 172.0264 | -9.7808  | -3.2421 | 225.0861 | 6.9283  | 6.8709  |
| <b>ASN</b> | dgaussian | 26.2122 | 127.4087 | -14.3430 | 5.2280  | 184.9654 | 15.1838 | 11.5617 |
| <b>GLN</b> | dgaussian | 28.9380 | 71.9467  | -14.7575 | 4.4234  | 115.9907 | 9.9989  | 10.0199 |
| <b>SER</b> | dgaussian | 40.6483 | 156.7841 | -8.8986  | 7.0755  | 222.5365 | 13.7595 | 9.2514  |
| <b>THR</b> | dgaussian | 27.1084 | 124.4057 | -11.8590 | 6.3334  | 182.7258 | 11.6498 | 12.3484 |
| <b>ALA</b> | gaussian  | 49.8598 | 230.6812 | 2.8176   | 14.0284 |          |         |         |
| <b>GLY</b> | gaussian  | 11.7367 | 345.2370 | 4.0755   | 17.1572 |          |         |         |
| <b>ILE</b> | gaussian  | 27.5348 | 104.5430 | -0.6901  | 13.5805 |          |         |         |
| <b>LEU</b> | gaussian  | 50.5373 | 298.7281 | -2.2565  | 9.9534  |          |         |         |
| <b>VAL</b> | gaussian  | 38.1035 | 217.5332 | -0.3895  | 10.2598 |          |         |         |
| <b>ARG</b> | dgaussian | 27.0737 | 84.7174  | -13.1119 | 5.4989  | 151.5175 | 11.9019 | 10.9967 |
| <b>ASP</b> | dgaussian | 33.2685 | 131.1659 | -14.3802 | 6.8511  | 251.8404 | 17.2180 | 8.4928  |
| <b>GLU</b> | dgaussian | 25.0175 | 71.0348  | -13.0992 | 7.7363  | 106.7172 | 13.3075 | 10.4151 |
| <b>LYS</b> | dgaussian | 18.1530 | 111.8809 | -11.9914 | 6.6853  | 146.4727 | 18.8114 | 8.6094  |
| <b>CYS</b> | gaussian  | 4.0620  | -3.0216  | 8.8661   | 11.8573 |          |         |         |
| <b>MET</b> | gaussian  | 6.1678  | 46.1242  | 3.2229   | 13.4698 |          |         |         |
| <b>PRO</b> | dgaussian | 14.8918 | 111.5543 | -13.5661 | 5.0001  | 57.7180  | 17.3520 | 13.2913 |

**Supplementary Table 4:**

Fitting parameters for implicit membrane potential for  $\alpha$ -helical proteins and lipid accessible residues (see Figure 2).

| amino acid | function  | a        | b        | c       | d        | e            | f        | g        | residual |
|------------|-----------|----------|----------|---------|----------|--------------|----------|----------|----------|
| HIS        | dgaussian | 0.644    | 0.379    | -0.864  | 4.032    | 0.309        | -3.647   | 10.069   | 0.041    |
| PHE        | dgaussian | 1.900    | -114.339 | 2.124   | -556.724 | 112.093      | -0.120   | 803.289  | 0.132    |
| TRP        | dgaussian | 0.669    | -0.488   | -14.624 | 6.484    | -0.570       | 16.959   | 8.314    | 0.135    |
| TYR        | dgaussian | -432.871 | 433.008  | -23.494 | 1319.332 | 0.370        | 0.289    | 4.741    | 0.141    |
| ASN        | dgaussian | -226.712 | 0.274    | 1.306   | 3.618    | 227.260      | 1.558    | 453.920  | 0.213    |
| GLN        | dgaussian | -0.802   | -0.246   | 14.552  | 4.608    | 1.783        | 3.644    | 21.540   | 0.327    |
| SER        | dgaussian | 0.019    | -0.052   | -7.004  | 3.275    | -1143217.656 | 1225.720 | -92.327  | 0.110    |
| THR        | dgaussian | 0.005    | -0.041   | -14.337 | 7.356    | -1143217.656 | 1225.720 | -92.327  | 0.082    |
| ALA        | dgaussian | -0.225   | -0.288   | 1.987   | 10.600   | -0.037       | -0.603   | 0.786    | 0.091    |
| GLY        | dgaussian | 4.162    | -115.350 | 0.028   | -429.832 | 110.873      | -7.915   | 883.013  | 0.281    |
| ILE        | dgaussian | -1.199   | 0.945    | -22.213 | 19.828   | 1.069        | 27.319   | 14.420   | 0.059    |
| LEU        | dgaussian | -0.764   | 0.242    | -22.321 | 7.317    | 0.109        | 15.827   | 5.989    | 0.055    |
| VAL        | dgaussian | 304.943  | -0.056   | 1.562   | -5.057   | -305.432     | -0.408   | 414.496  | 0.111    |
| ARG        | dgaussian | -0.151   | 1.371    | 0.492   | 6.720    | 0.528        | 19.864   | 11.672   | 0.323    |
| ASP        | dgaussian | 0.631    | 0.502    | -6.791  | 3.694    | 0.472        | 4.589    | 5.246    | 0.237    |
| GLU        | dgaussian | 0.127    | 0.171    | -2.667  | 3.262    | 0.853        | 0.108    | 9.902    | 0.317    |
| LYS        | dgaussian | 0.004    | 1.489    | 1.154   | 7.412    | 0.404        | 16.750   | 3.356    | 0.279    |
| CYS        | dgaussian | 17.414   | -0.760   | 1.001   | -10.268  | -16.018      | -0.723   | -188.362 | 0.207    |
| MET        | dgaussian | 2.191    | -113.071 | -2.883  | -594.978 | 111.104      | 2.494    | 778.256  | 0.119    |
| PRO        | dgaussian | -0.169   | 0.074    | 0.236   | -4.892   | 0.583        | -4.213   | -14.948  | 0.164    |

**Supplementary Table 5:**

Fitting parameters for implicit membrane potential for  $\alpha$ -helical proteins and lipid inaccessible residues (see Figure 2).

| <b>amino acid</b> | <b>function</b> | <b>a</b> | <b>b</b>  | <b>c</b> | <b>d</b>  | <b>e</b>     | <b>f</b> | <b>g</b> | <b>residual</b> |
|-------------------|-----------------|----------|-----------|----------|-----------|--------------|----------|----------|-----------------|
| <b>HIS</b>        | dgaussian       | 0.287    | 0.560     | -6.816   | 6.725     | 0.233        | 5.254    | 8.905    | 0.215           |
| <b>PHE</b>        | dgaussian       | 0.012    | -0.035    | 21.620   | 0.582     | -0.294       | 3.191    | 10.943   | 0.207           |
| <b>TRP</b>        | poly4d          | 0.000    | 0.000     | -0.001   | -0.016    | 0.558        | -        | -        | 0.539           |
| <b>TYR</b>        | dgaussian       | -0.178   | 0.556     | -2.669   | 12.983    | 0.191        | -4.527   | 2.596    | 0.382           |
| <b>ASN</b>        | dgaussian       | 0.096    | 0.302     | 7.629    | 3.717     | 0.285        | -7.442   | -6.288   | 0.135           |
| <b>GLN</b>        | dgaussian       | 0.059    | 0.816     | -0.722   | 10.498    | -0.232       | 5.819    | -2.551   | 0.150           |
| <b>SER</b>        | dgaussian       | -0.154   | 0.053     | -1.588   | 4.882     | -1143217.656 | 1225.720 | -92.327  | 0.254           |
| <b>THR</b>        | dgaussian       | -0.179   | 0.129     | -14.087  | 5.644     | -1143217.656 | 1225.720 | -92.327  | 0.432           |
| <b>ALA</b>        | dgaussian       | 1070.802 | -1071.379 | 1.351    | -832.579  | -1143217.656 | 1225.720 | -92.327  | 0.229           |
| <b>GLY</b>        | dgaussian       | 2584.551 | -2585.073 | 0.967    | -1315.588 | -1143217.656 | 1225.720 | -92.327  | 0.407           |
| <b>ILE</b>        | dgaussian       | -0.101   | -0.035    | 21.620   | 0.582     | -0.343       | -2.398   | 8.978    | 0.395           |
| <b>LEU</b>        | dgaussian       | -0.178   | -0.376    | -2.325   | 18.002    | -1143217.656 | 1225.720 | -92.327  | 0.087           |
| <b>VAL</b>        | dgaussian       | -0.195   | -0.035    | 21.620   | 0.582     | -0.211       | -3.281   | 7.380    | 0.440           |
| <b>ARG</b>        | dgaussian       | -0.418   | 1.098     | 10.002   | 7.174     | 1.410        | -4.749   | 5.593    | 0.724           |
| <b>ASP</b>        | dgaussian       | -0.016   | 0.520     | -9.198   | 5.595     | 1.103        | 4.249    | 5.842    | 0.637           |
| <b>GLU</b>        | dgaussian       | 0.228    | 0.687     | -2.003   | 6.339     | 0.226        | 11.252   | 1.890    | 0.338           |
| <b>LYS</b>        | dgaussian       | -1.412   | 0.525     | 2.994    | 1.709     | 2.642        | 2.018    | 15.301   | 0.707           |
| <b>CYS</b>        | dgaussian       | 1826.803 | -0.035    | 21.620   | 0.582     | -1826.134    | -0.184   | 690.803  | 0.353           |
| <b>MET</b>        | dgaussian       | 676.000  | -0.035    | 21.620   | 0.582     | -675.991     | 0.443    | 504.612  | 0.255           |
| <b>PRO</b>        | dgaussian       | -0.096   | 0.567     | 5.524    | 3.684     | 0.406        | -5.893   | -8.485   | 0.269           |



**Supplementary Table 6:**

Fitting parameters for implicit membrane potential for  $\beta$ -barrel proteins and lipid accessible residues (see Figure 2).

| <b>amino acid</b> | <b>function</b> | <b>a</b>   | <b>b</b>  | <b>c</b>  | <b>d</b>  | <b>e</b>  | <b>f</b> | <b>g</b> | <b>residual</b> |
|-------------------|-----------------|------------|-----------|-----------|-----------|-----------|----------|----------|-----------------|
| <b>HIS</b>        | dgaussian       | -543.314   | 1.281     | -2.018    | 3.081     | 544.076   | -49.107  | 1520.739 | 0.513           |
| <b>PHE</b>        | dgaussian       | -0.571     | -0.136    | 6.414     | -3.884    | 0.756     | 18.227   | 15.817   | 0.113           |
| <b>TRP</b>        | dgaussian       | 2268.535   | 1.011     | -1.128    | 4.095     | -2268.798 | -1.895   | -826.541 | 0.483           |
| <b>TYR</b>        | dgaussian       | 0.331      | -0.730    | -9.552    | 6.838     | -0.951    | 7.359    | 5.304    | 0.296           |
| <b>ASN</b>        | dgaussian       | -141.565   | 141.560   | -6.652    | 320.865   | 1.051     | -2.304   | 5.443    | 0.288           |
| <b>GLN</b>        | dgaussian       | -0.155     | 0.408     | -18.012   | 27.657    | 0.881     | -3.437   | 4.754    | 0.386           |
| <b>SER</b>        | dgaussian       | -0.487     | 0.599     | -17.677   | 20.128    | 0.775     | 1.105    | -4.328   | 0.106           |
| <b>THR</b>        | dgaussian       | -4.835     | 115.484   | -10.740   | 368.628   | -110.555  | 15.296   | -872.002 | 0.304           |
| <b>ALA</b>        | dgaussian       | -1.328     | 1.342     | 15.826    | 10.693    | 1.167     | -14.487  | 7.966    | 0.147           |
| <b>GLY</b>        | dgaussian       | -126.817   | -0.331    | 1.144     | -4.359    | 126.700   | 0.856    | 281.733  | 0.140           |
| <b>ILE</b>        | poly4d          | 0.000      | 0.000     | 0.004     | 0.021     | -0.195    | -        | -        | 0.362           |
| <b>LEU</b>        | dgaussian       | -2.126     | 2.523     | 22.202    | 16.175    | 1.437     | -17.468  | 9.936    | 0.317           |
| <b>VAL</b>        | dgaussian       | -0.762     | 1.295     | 17.600    | 7.458     | 1.328     | -29.431  | 12.095   | 0.267           |
| <b>ARG</b>        | dgaussian       | -0.251     | 0.899     | -7.883    | 7.971     | 0.648     | 0.861    | 3.973    | 0.507           |
| <b>ASP</b>        | dgaussian       | -0.524     | 0.492     | -15.813   | 3.457     | 1.951     | -1.495   | 6.420    | 0.236           |
| <b>GLU</b>        | dgaussian       | -12999.587 | 13006.329 | -1525.155 | 47781.041 | 1.171     | -1.646   | 7.672    | 0.817           |
| <b>LYS</b>        | dgaussian       | -0.616     | 1.104     | -5.885    | 12.758    | 1.499     | -0.598   | 4.393    | 0.676           |
| <b>CYS</b>        | -               | -          | -         | -         | -         | -         | -        | -        | -               |
| <b>MET</b>        | poly4d          | 0.000      | 0.000     | 0.002     | -0.007    | 0.649     | -        | -        | 0.538           |
| <b>PRO</b>        | dgaussian       | -0.143     | 0.617     | 7.577     | 12.261    | 0.226     | 1.922    | 5.407    | 0.139           |

**Supplementary Table 7:**

Fitting parameters for implicit membrane potential for  $\beta$ -barrel proteins and lipid inaccessible residues (see Figure 2).

| amino acid | function  | a        | b        | c       | d          | e            | f        | g         | residual |
|------------|-----------|----------|----------|---------|------------|--------------|----------|-----------|----------|
| HIS        | dgaussian | 0.623    | 0.284    | 8.639   | -2.752     | 0.423        | -3.317   | 4.590     | 0.400    |
| PHE        | dgaussian | 0.308    | -0.470   | -7.232  | 12.398     | 0.454        | -4.604   | 5.944     | 0.110    |
| TRP        | poly4d    | 0.000    | 0.000    | 0.000   | 0.005      | 0.884        | -        | -         | 0.512    |
| TYR        | dgaussian | 0.681    | -0.649   | 6.671   | 18.437     | -0.119       | -10.570  | 2.213     | 0.080    |
| ASN        | dgaussian | -5.284   | 116.313  | 0.107   | 347.070    | -111.165     | 36.742   | -2262.392 | 0.322    |
| GLN        | dgaussian | 37.569   | -0.158   | 9.557   | -4.053     | -37.546      | -9.669   | -405.899  | 0.184    |
| SER        | dgaussian | -0.015   | -0.379   | 12.327  | 9.330      | -0.410       | -7.446   | 6.651     | 0.163    |
| THR        | dgaussian | -0.108   | -0.180   | 10.886  | 4.677      | -0.281       | -8.918   | 4.673     | 0.100    |
| ALA        | dgaussian | 2.222    | 110.312  | -0.144  | 814.458    | -112.775     | 8.550    | -538.112  | 0.246    |
| GLY        | dgaussian | -0.029   | -0.621   | -3.255  | 20.295     | 0.212        | -10.070  | 3.782     | 0.083    |
| ILE        | dgaussian | 0.197    | 0.218    | -10.009 | 1.849      | 0.110        | -6.568   | 7.466     | 0.260    |
| LEU        | dgaussian | 2.279    | 110.370  | -25.815 | 2914.210   | -112.718     | -0.068   | -471.648  | 0.530    |
| VAL        | dgaussian | 2.298    | 110.388  | -5.320  | -17095.160 | -112.698     | 2.350    | -359.740  | 0.426    |
| ARG        | dgaussian | -0.066   | -0.134   | -4.760  | -7.661     | -1143217.656 | 1225.720 | -92.327   | 0.334    |
| ASP        | dgaussian | -598.378 | 0.171    | 9.882   | 1.778      | 598.245      | -1.780   | 560.561   | 0.140    |
| GLU        | dgaussian | 2.784    | -113.807 | -1.779  | -560.687   | 110.981      | 3.888    | 806.902   | 0.176    |
| LYS        | dgaussian | -0.111   | 0.507    | 10.255  | 3.227      | 0.358        | 2.911    | -3.717    | 0.192    |
| CYS        | -         | -        | -        | -       | -          | -            | -        | -         | -        |
| MET        | dgaussian | 0.889    | -0.327   | -1.472  | 3.873      | -0.379       | 9.121    | 4.385     | 0.324    |
| PRO        | dgaussian | 0.036    | 0.629    | -2.988  | 5.123      | 0.513        | 10.726   | 5.112     | 0.238    |

**Supplementary Figure S3:**

Free energy scores for the native position (position (0, 0) in Figure 6) of each protein in the database: The scores for the lipid-accessible residues is shown in orange, for lipid-inaccessible residues in blue and the total scores are shown as '-'. (A) Scores for all 239 proteins in our  $\alpha$ -helical membrane protein database. Lipid-inaccessible residues contribute on average about 19.57% to the total score – these residues are most often buried in the protein interior. (B) Scores for all 96 proteins in our  $\beta$ -barrel database. Lipid-inaccessible residues contribute on average 40.70% to the overall score. Since lipid-inaccessible residues mostly face the aqueous pore in  $\beta$ -barrels, the contribution of pore-facing residues to overall insertion and stability is considerably higher than was previously suggested by Liang et al.<sup>1</sup>. However, there is excellent agreement between the values suggested for OmpLA (gray box): Liang et al. estimated that lipid-facing contribute 16.67% to overall insertion, while our predicted value for OmpLA is 16.95%.

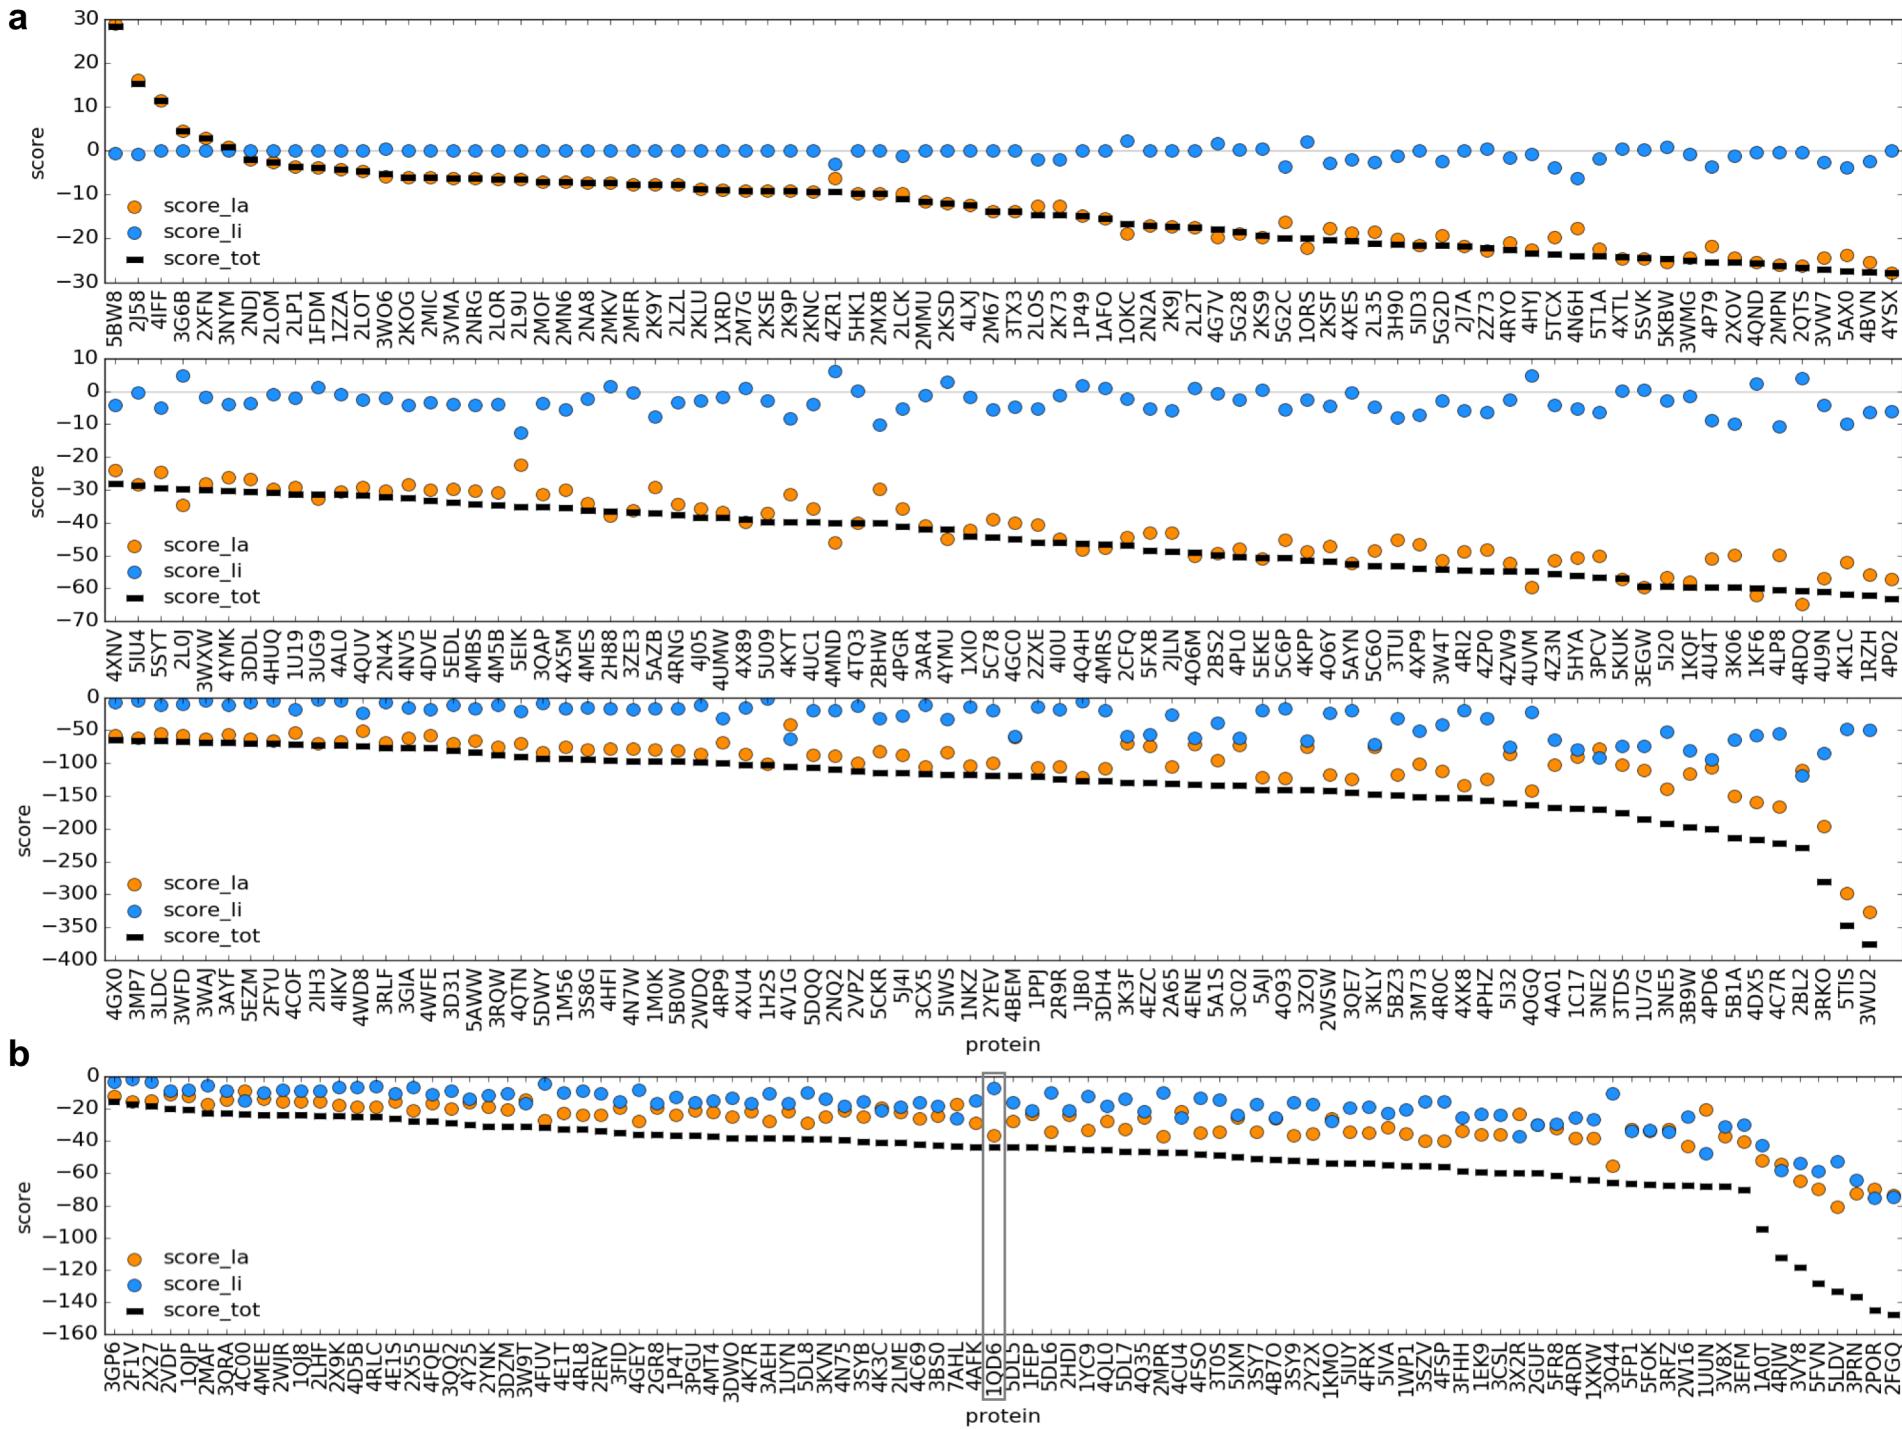

### Supplementary Figure S4:

Histograms for TM span lengths (left) and tilt angles (right) for  $\alpha$ -helical (top) and  $\beta$ -barrel (bottom) membrane proteins derived from our databases show that statistics agree well with previous analyses. When deriving statistics on the  $\alpha$ -helical and  $\beta$ -barrel databases, we also investigated TM span lengths and tilt angles for individual secondary structure elements (as opposed to tilt angles of entire proteins). For the  $\alpha$ -helical bundles in our database, TM spans were on average  $26.0 \pm 7.9$  residues in length with an average tilt angle of  $22.9 \pm 12.7^\circ$ . These values are in excellent agreement with previous analyses<sup>2,3</sup>. For the  $\beta$ -barrels in our database, TM spans were on average  $12.9 \pm 4.1$  residues in length with an average tilt angle of  $37.3 \pm 9.6^\circ$ . From these values, an average membrane thickness can be estimated, which would be  $35.9 \text{ \AA}$  for the thickness derived from  $\alpha$ -helical MPs (assuming a  $1.5 \text{ \AA}$  rise per residue) and  $36.0 \text{ \AA}$  for the thickness derived from  $\beta$ -barrel MPs (assuming a  $3.5 \text{ \AA}$  rise per residue). These values, however, are derived under the assumption that the entire TM span is located in the membrane, which doesn't always hold true, especially not for many outer membrane  $\beta$ -barrels that have long strands sticking into the oligosaccharide region of the LPS outer membrane leaflet<sup>4</sup>.

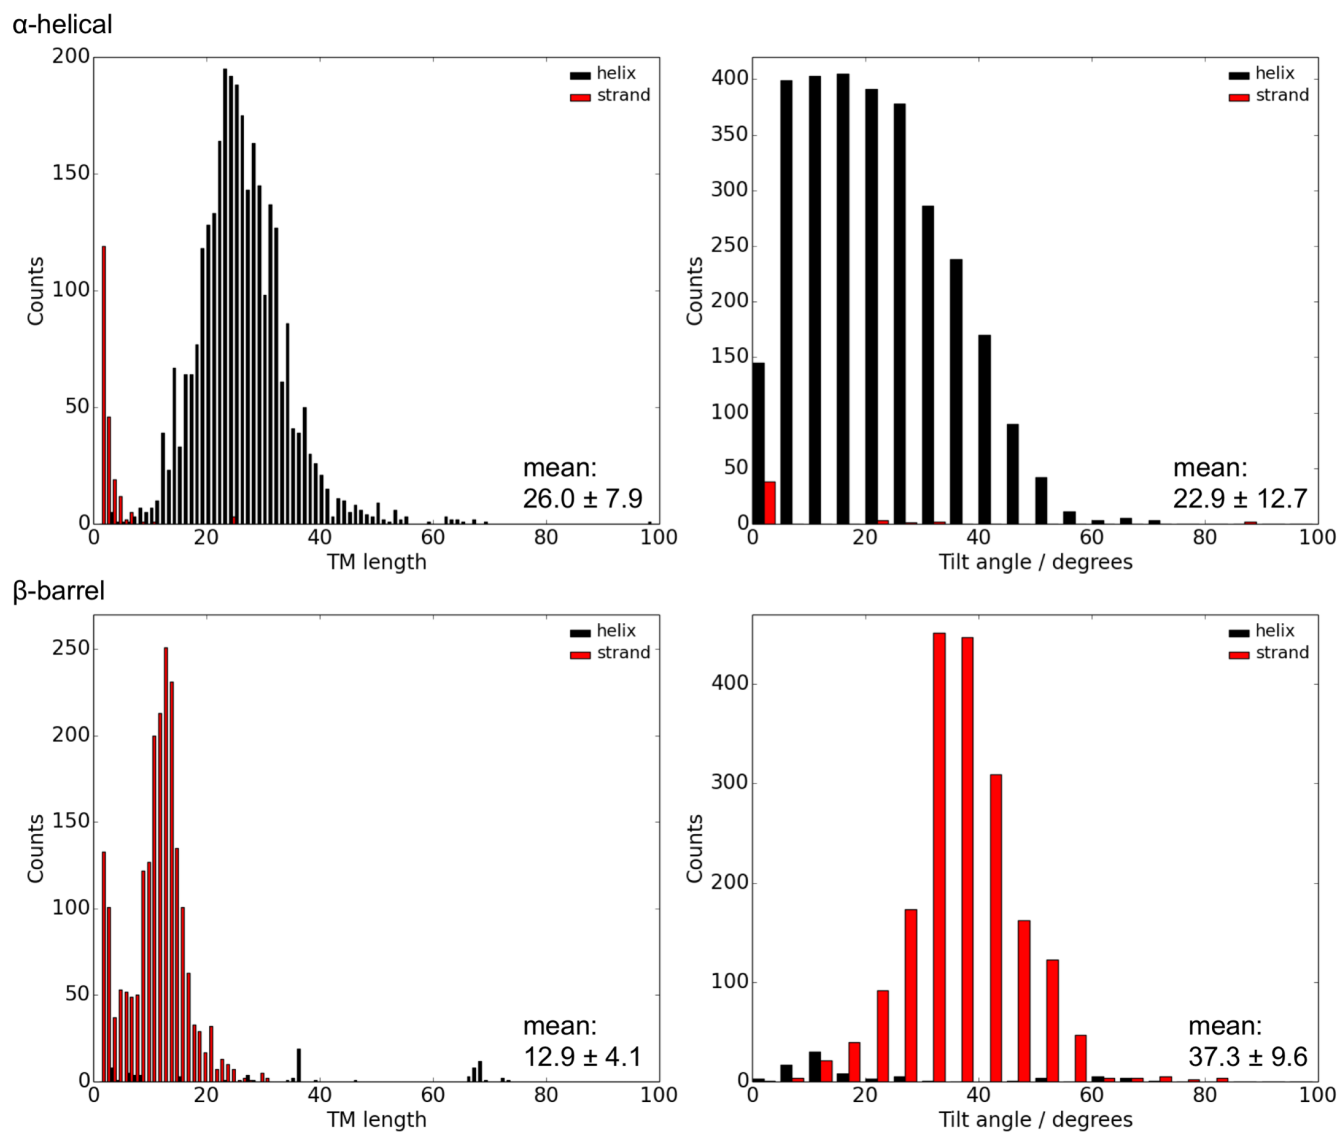

**References:**

1. Lin, M., Gessmann, D., Naveed, H. & Liang, J. Outer membrane protein folding and topology from a computational transfer free energy scale. *J. Am. Chem. Soc.* **138**, 2592–2601 (2016).
2. Ulmschneider, M. B., Sansom, M. S. P. & Di Nola, A. Properties of integral membrane protein structures: Derivation of an implicit membrane potential. *Proteins Struct. Funct. Genet.* **59**, 252–265 (2005).
3. Bowie, J. U. Helix packing in membrane proteins. *J. Mol. Biol.* **272**, 780–789 (1997).
4. Pavlova, A., Hwang, H., Lundquist, K., Balusek, C. & Gumbart, J. C. Living on the edge: Simulations of bacterial outer-membrane proteins. (2016). doi:10.1016/j.bbamem.2016.01.020
